# Supplementary material for: Self-Supporting Conductive Polyaniline–Sodium Alginate–Graphene Oxide/Carbon Brush Hydrogel as Anode Material for Enhanced Energy in Microbial Fuel Cells
Source: MDPI journal article supplement (doi:10.3390/coatings13040790), 2023-04-19
Supplement: s1 [file s1]

Archive with 1 entries (1 files):
- coatings-2282340-supplementary.pdf
